# Supplementary material for: Comparison of porous and nonporous materials for methane storage
Source: Royal Society of Chemistry journal article supplement (doi:10.1039/b610321a), 2006-10-20
Supplement: b610321a.pdf [file b610321a.pdf]

---

Supporting Information for *New Journal of Chemistry*

## Comparison of Porous and Nonporous Materials for Methane Storage

**Praveen K. Thallapally<sup>a\*</sup>, Karen A. Kirby<sup>b</sup> and Jerry L. Atwood<sup>b,\*</sup>**

<sup>a</sup>Pacific Northwest National Laboratory, 902 Battelle Blvd., Richland, WA, 99354. USA

Tel: +1 509 376 1145, Fax: +1 509 376 5368; Email: [praveen.thallapally@pnl.gov](mailto:praveen.thallapally@pnl.gov)

<sup>b</sup>Department of Chemistry, University of Missouri-Columbia, Columbia, MO 65211, U.S.A. Tel: +1 573 882 2754 Fax: (+1) 573-882-2754-. Email: [atwoodj@missouri.edu](mailto:atwoodj@missouri.edu)

## Experimental Details:

Solid state NMR was done on a Bruker DRX300 wide bore spectrometer equipped with a 7mm CP-MAS probe.<sup>1</sup> The operating frequencies are 300.13213 (<sup>1</sup>H) and 75.47359 (<sup>13</sup>C). About 200 mg of finely ground powder was used to fully pack a 7mm Zirconia rotor. For all the samples proton decoupled <sup>13</sup>C CP-MAS (Cross Polarization1 with Magic Angle Spinning)<sup>2,3</sup> was performed at spinning rate of 5 KHz. TOSS (Total Suppression of Sidebands)<sup>4</sup> was applied to remove the sidebands caused by spinning. The total time for data collection ranges from a few hours to overnight. The spectra were collected with 2K data points with 34 ms acquisition time and 2 s of relaxation delay. Data was zero-filled to 8K and a 5 Hz line-broadening was also applied. The external chemical shift reference was CO carbon of glycine at 176.03 PPM.

## References:

1. A. Pines, M. G. Gibby and J. S. Waugh, *J. Chem. Phys.*, **1973**, *59*, 569.
2. J. Schaefer and E. O. Stejskal, In *Topics in <sup>13</sup>C NMR spectroscopy*, vol. 3, (ed. G. C. Levy), pp. 283-324. Wiley, New York (1979).
3. E. R. Andrew, *Prog. N. M. R. spectrosc.*, **1971**, *8*, 1.
4. W. T. Dixon, *et. al.*, *J. Magn. Reson.* **1982**, *49*, 341.

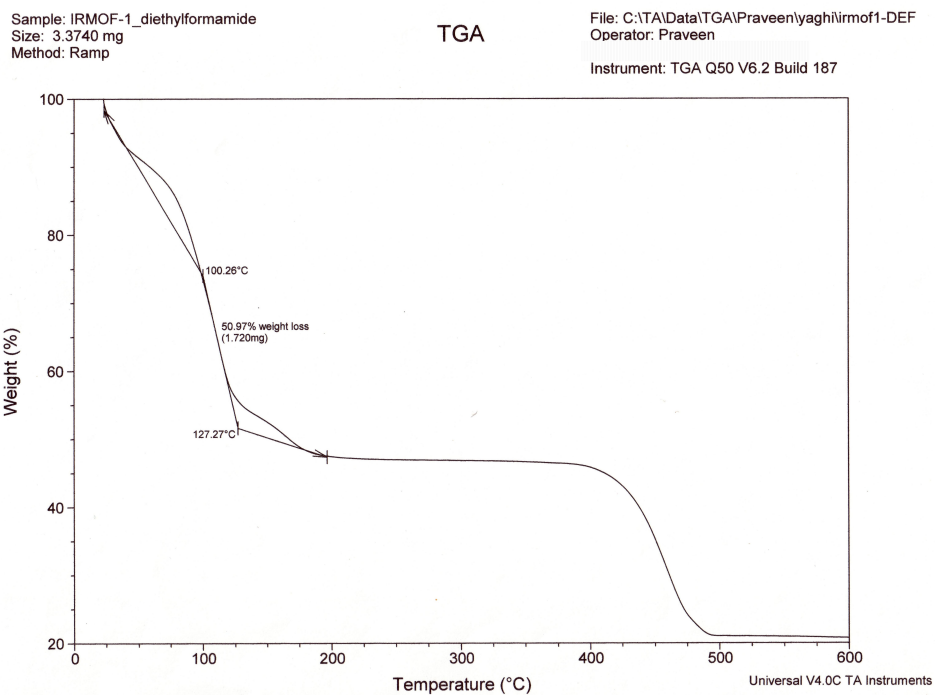

**Fig. S1.** Sample of **2** was heated gradually to 600 °C under inert atmosphere. A large and sharp weight loss of 50% of the original sample was observed below 200 °C, which attributes to the release of diethylformamide from the host cavity.

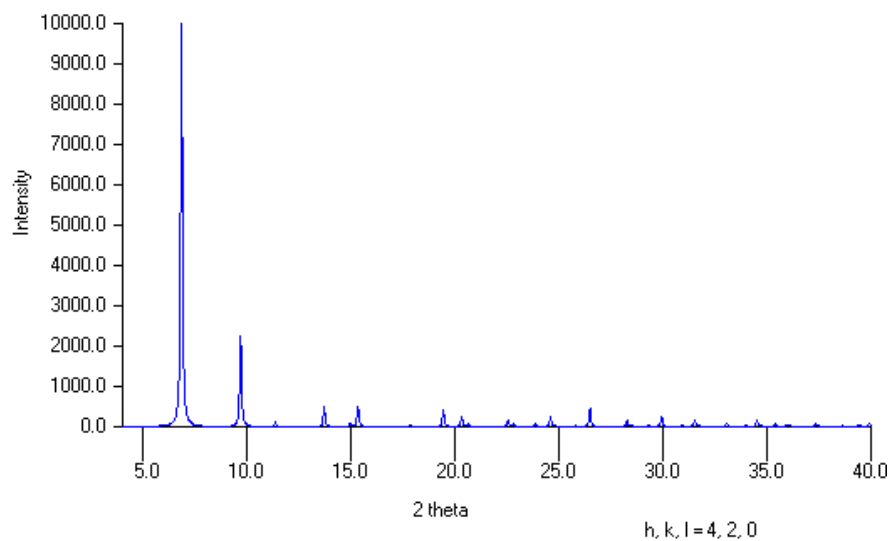

**Fig. S2.** Calculated powder pattern of **2** using the coordinates published by *Yaghi et. al.*, (Ref. 10a and 10d).

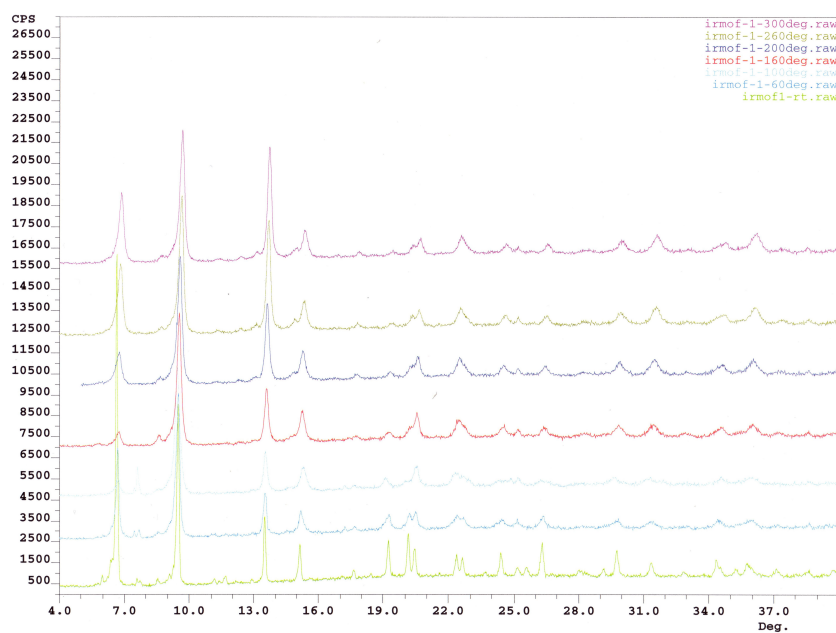

**Fig. S3.** Variable powder diffraction of **2** indicates the porous nature of the host molecule upon desolvation. Figure S1 and S2 represents the host network in sample **2** is identical to the reported IRMOF-1 (*Yaghi et. al.*, ref. 11a and 11d).

05/17/2006

Page 1

Quantachrome Instruments  
Quantachrome Autosorb Automated Gas Sorption System Report  
Autosorb 1 for Windows 1.51

File name: C:\QCdata\PhysData\AS651601.raw  
Sample ID: TBC 4 Description: Calixerene TBC 4  
Comments:  
Operator: jwb Sample weight: 0.083 g  
Analysis gas: Nitrogen X sect. area: 16.2 Å<sup>2</sup>/molec Non-ideality: 6.58e-05  
Adsbate (DRP): Nitrogen Bath Temp.: 77.30  
Outgas Temp: 120.0 °C Outgas Time: 12.0 hrs Analysis Time: 67.6 min  
P/Po tolerance: 0 Equil. time: 3 End of run: 05/16/2006 17:08  
Station #: 1 PC sw. version: 1.51 TempComp: Off  
MULTIPOINT BET

| P/Po       | Volume<br>[cc/g] STP | 1/(W((Po/P)-1)) |
|------------|----------------------|-----------------|
| 5.2632e-02 | 0.1271               | 3.498E+02       |
| 7.7975e-02 | 0.2025               | 3.341E+02       |
| 1.0291e-01 | 0.2604               | 3.525E+02       |
| 1.5275e-01 | 0.4489               | 3.214E+02       |
| 2.0291e-01 | 0.5949               | 3.424E+02       |
| 2.5268e-01 | 0.8361               | 3.236E+02       |
| 3.0239e-01 | 1.1299               | 3.069E+02       |

Area = 1.589E+01 m<sup>2</sup>/g

Slope = -1.361E+02

Y - Intercept = 3.552E+02

Correlation Coefficient = 0.763987

C = 6.169E-01

Page 1

05/17/2006

Quantachrome Instruments  
Quantachrome Autosorb Automated Gas Sorption System Report  
Autosorb 1 for Windows 1.51

File name: C:\QCdata\PhysData\AS651601.raw  
Sample ID: TBC 4 Description: Calixerene TBC 4  
Comments:  
Operator: jwb Sample weight: 0.083 g  
Analysis gas: Nitrogen X sect. area: 16.2 Å<sup>2</sup>/molec Non-ideality: 6.58e-05  
Adsbate (DRP): Nitrogen Bath Temp.: 77.30  
Outgas Temp: 120.0 °C Outgas Time: 12.0 hrs Analysis Time: 67.6 min  
P/Po tolerance: 0 Equil. time: 3 End of run: 05/16/2006 17:08  
Station #: 1 PC sw. version: 1.51 TempComp: Off  
Isotherm

| P/Po       | Volume<br>[cc/g] STP |
|------------|----------------------|
| 5.2632e-02 | 0.1271               |
| 7.7975e-02 | 0.2025               |
| 1.0291e-01 | 0.2604               |
| 1.5275e-01 | 0.4489               |
| 2.0291e-01 | 0.5949               |
| 2.5268e-01 | 0.8361               |
| 3.0239e-01 | 1.1299               |

05/17/2006

Quantachrome Instruments  
Quantachrome Autosorb Automated Gas Sorption System Report  
Autosorb 1 for Windows 1.51

|                 |                                 |                 |                            |
|-----------------|---------------------------------|-----------------|----------------------------|
| File name:      | C:\QCdata\PhysData\AS651601.raw |                 |                            |
| Sample ID:      | TBC 4                           | Description:    | Calixerene TBC 4           |
| Comments:       |                                 |                 |                            |
| Operator:       | jwb                             | Sample weight:  | 0.083 g                    |
| Analysis gas:   | Nitrogen                        | X sect. area:   | 16.2 Å <sup>2</sup> /molec |
| Adsbate (DRP):  | Nitrogen                        | Bath Temp.:     | 77.30                      |
| Outgas Temp:    | 120.0 °C                        | Outgas Time:    | 12.0 hrs                   |
| P/Po tolerance: | 0                               | Equil. time:    | 3                          |
| Station #:      | 1                               | PC sw. version: | 1.51                       |
|                 |                                 | Non-ideality:   | 6.58e-05                   |
|                 |                                 | Analysis Time:  | 67.6 min                   |
|                 |                                 | End of run:     | 05/16/2006 17:08           |
|                 |                                 | TempComp:       | Off                        |

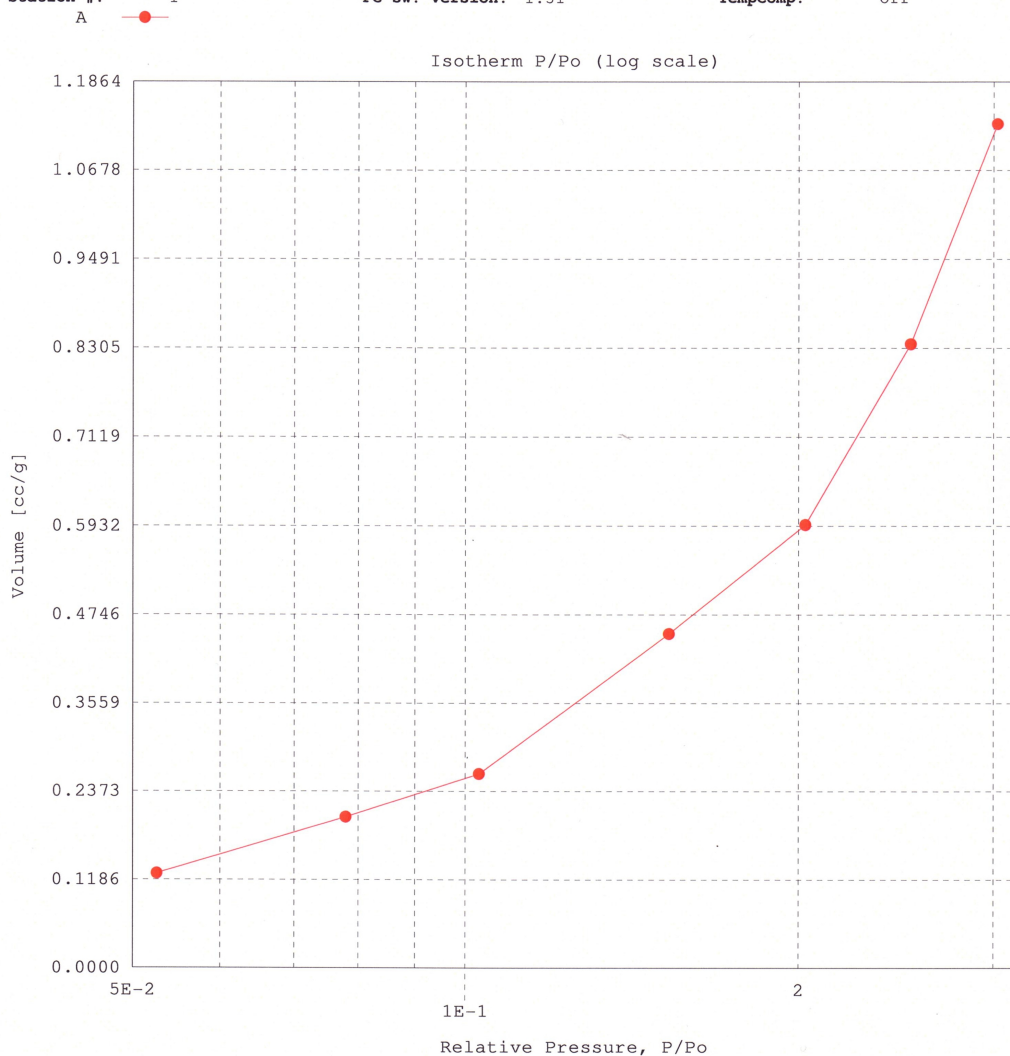

05/17/2006

Quantachrome Instruments  
Quantachrome Autosorb Automated Gas Sorption System Report  
Autosorb 1 for Windows 1.51

|                  |                                 |                 |                            |
|------------------|---------------------------------|-----------------|----------------------------|
| File name:       | C:\QCdata\PhysData\AS651601.raw | Description:    | Calixerene TBC 4           |
| Sample ID:       | TBC 4                           | Sample weight:  | 0.083 g                    |
| Comments:        |                                 | X sect. area:   | 16.2 Å <sup>2</sup> /molec |
| Operator:        | jwb                             | Bath Temp.:     | 77.30                      |
| Analysis gas:    | Nitrogen                        | Outgas Time:    | 12.0 hrs                   |
| Adsorbate (DRP): | Nitrogen                        | Equil. time:    | 3                          |
| Outgas Temp:     | 120.0 °C                        | PC sw. version: | 1.51                       |
| P/Po tolerance:  | 0                               | Non-ideality:   | 6.58e-05                   |
| Station #:       | 1                               | Analysis Time:  | 67.6 min                   |
|                  |                                 | End of run:     | 05/16/2006 17:08           |
|                  |                                 | TempComp:       | Off                        |

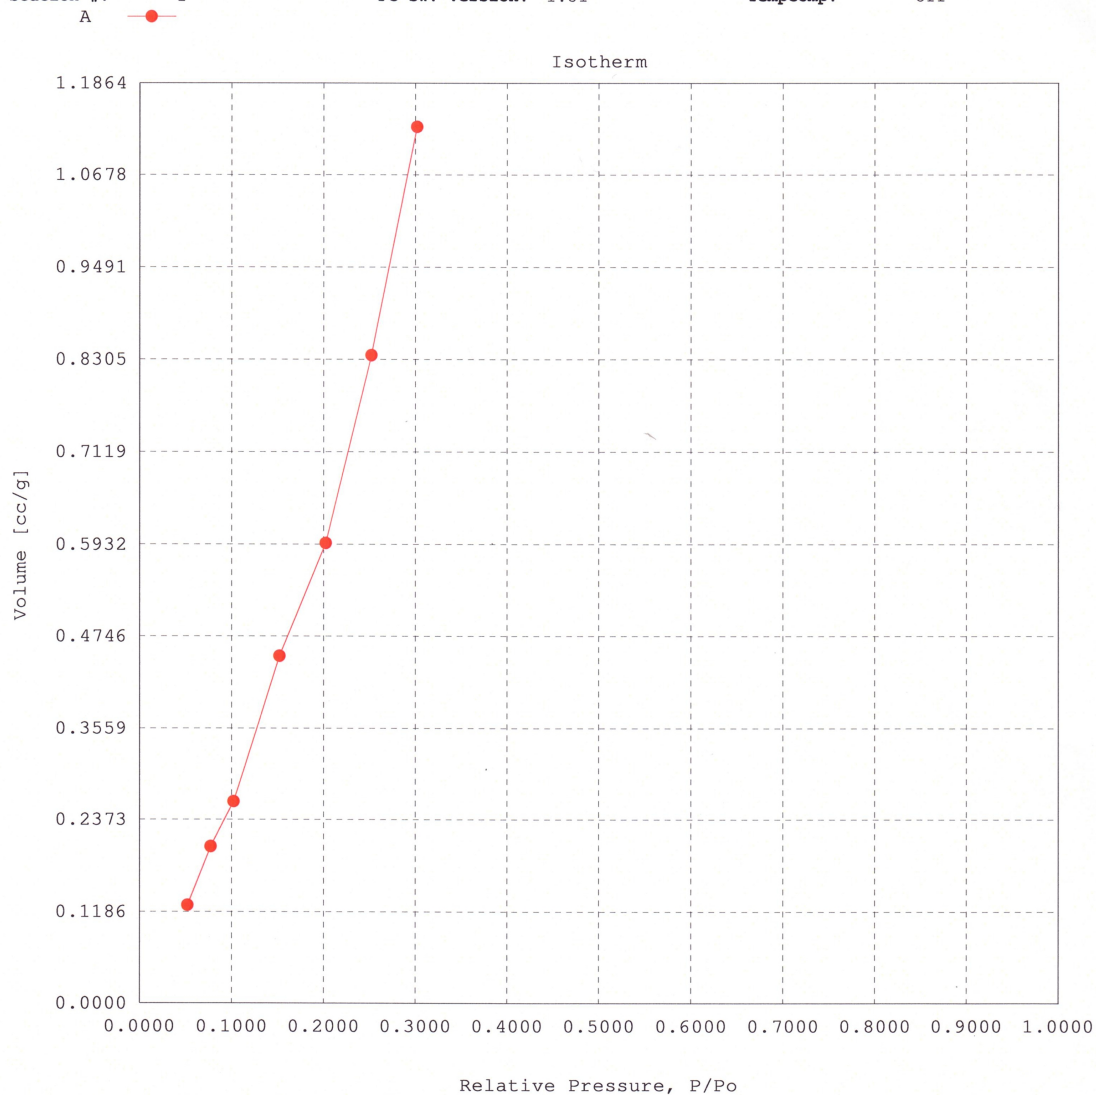

Fig. S4. BET measurement on sample 1 at 77 K and 1 atm pressure indicating the low surface area of the material.
